# Supplementary material
Source: publisher figshare collection journal article supplement (https://acs.figshare.com/ndownloader/files/5032255)
Supplement: Supplementary file 1 [file 5032255]

## Supporting Information

### Four-Electron Oxidation of Phenols to *p*-Benzoquinone Imines by a (Salen)ruthenium(VI) Nitrido Complex

Jianhui Xie,<sup>†</sup> Wai-Lun Man,<sup>†</sup> Chun-Yuen Wong,<sup>†</sup> Xiaoyong Chang,<sup>‡</sup> Chi-Ming Che<sup>‡</sup> and Tai-Chu Lau<sup>\*,†</sup>

<sup>†</sup>Department of Biology and Chemistry and Institute of Molecular Functional Materials, City University of Hong Kong, Tat Chee Avenue, Hong Kong, China, <sup>‡</sup>Department of Chemistry and State Key Laboratory of Synthetic Chemistry, The University of Hong Kong, Pokfulam Road, Hong Kong, China.

E-mail: [bhtclau@cityu.edu.hk](mailto:bhtclau@cityu.edu.hk)

## Table of Contents

|                   |                                                                                                                                                                                 |     |
|-------------------|---------------------------------------------------------------------------------------------------------------------------------------------------------------------------------|-----|
| <b>Table S1</b>   | Crystal data and structure refinement details for <b>2b</b> and <b>3</b>                                                                                                        | S7  |
| <b>Table S2</b>   | $E_{1/2}$ values of <b>2a</b> , <b>2b</b> and $[\text{Ru}^{\text{III}}(\text{L})(\text{py})_2]^+$ in $\text{CH}_3\text{CN}$                                                     | S7  |
| <b>Table S3</b>   | Second-order rate constants and KIEs of the reaction of <b>1</b> and phenol in the presence of py in $\text{CH}_3\text{OH}$ at 25 °C                                            | S8  |
| <b>Table S4</b>   | Second-order rate constants for the first phase of the reaction of <b>1</b> with 2,6-disubstituted phenols in the presence of 0.1 M py in $\text{CH}_3\text{OH}$                | S8  |
| <b>Figure S1</b>  | UV–vis spectral changes for the reaction of <b>1</b> with $\text{C}_6\text{H}_5\text{OH}$ in $\text{CH}_3\text{OH}$                                                             | S9  |
| <b>Figure S2</b>  | ESI mass spectrum of the green solution for the reaction of <b>1</b> with excess phenol in $\text{CH}_3\text{OH}$                                                               | S10 |
| <b>Figure S3</b>  | ESI mass spectrum for the reaction of <b>1</b> with $\text{C}_6\text{H}_5\text{OH}$ in 0.1 M py in $\text{CH}_3\text{OH}$ .                                                     | S11 |
| <b>Figure S4</b>  | Molecular structure of <b>2a</b>                                                                                                                                                | S12 |
| <b>Figure S5</b>  | 400 MHz $^1\text{H}$ NMR and ( <i>H,H</i> ) COSY spectra of <b>2a</b> in $\text{DMSO}-d_6$                                                                                      | S13 |
| <b>Figure S6</b>  | 400 MHz $^1\text{H}$ NMR spectrum of <b>2b</b> in $\text{DMSO}-d_6$                                                                                                             | S14 |
| <b>Figure S7</b>  | ESI mass spectrum of <b>2a</b> in $\text{CH}_3\text{OH}$                                                                                                                        | S15 |
| <b>Figure S8</b>  | IR spectra of <b>2a</b> and <b>3</b>                                                                                                                                            | S16 |
| <b>Figure S9</b>  | UV/vis spectra of <b>2a</b> and <b>2b</b> in $\text{CH}_3\text{OH}$ .                                                                                                           | S17 |
| <b>Figure S10</b> | Plots of $k_{\text{obs}}$ vs [phenol] for the first phase of the reaction of <b>1</b> with phenol in the presence of 0.1 M py in methanol at 25.0 °C                            | S18 |
| <b>Figure S11</b> | Plots of $k_{\text{obs}}$ vs [py] for the second phase of the reaction of <b>1</b> ( $5.00 \times 10^{-5}$ M) with phenol (0.06 M) in 0.1 M py in methanol at 25.0 °C           | S19 |
| <b>Figure S12</b> | Product analysis by ESI–MS for the reaction of <b>1</b> with 2,6-disubstituted phenols in the presence of 0.1 M py in $\text{CH}_3\text{OH}$                                    | S20 |
| <b>Figure S13</b> | Spectral changes at 1000 s intervals for the reaction between <b>1</b> and <i>p</i> -MeO- $\text{C}_6\text{H}_4\text{OH}$ in the presence of 0.1 M py in $\text{CH}_3\text{OH}$ | S21 |
| <b>Figure S14</b> | Product analysis for the reaction of <b>1</b> with <i>p</i> -MeO- $\text{C}_6\text{H}_4\text{OH}$ in the presence of py in $\text{CH}_3\text{OH}$                               | S21 |
| <b>Figure S15</b> | Spectral changes of the reaction of <b>1</b> with py in $\text{CH}_3\text{OH}$ at 25.0 °C                                                                                       | S22 |

**Materials.**  $[\text{Ru}^{\text{VI}}(\text{N})(\text{L})(\text{MeOH})](\text{PF}_6)$  (**1**) was prepared by a literature method.<sup>1</sup> Phenol and 2,6-di-*tert*-butylphenol (Sigma-Aldrich) were recrystallized from petroleum ether and ethanol, respectively. Pyridine (Sigma-Aldrich) was dried with KOH and freshly distilled before use under argon atmosphere. Methanol was dried with magnesium turnings and iodine and distilled under argon atmosphere.<sup>2</sup> Other substituted phenols and  $d_6$ -phenol (98 atom% D, Sigma-Aldrich) and  $d_4$ -methanol (99.8 atom % D, Cambridge Isotope) were used as received.

**Instrumentation.** Infrared spectra were obtained from KBr plates using a Nicolet 360 FT-IR spectrophotometer.  $^1\text{H}$  NMR spectra were recorded on a Bruker (400 MHz) FT NMR spectrometer. The chemical shifts ( $\delta$  ppm) were reported with reference to tetramethylsilane (TMS). Elemental analyses were done on an Elementar Vario EL analyzer. Electrospray ionization mass spectra (ESI-MS) were obtained on a PE SCIEX API 2000 mass spectrometer. Cyclic voltammetry (CV) was performed with a CH Instruments Electrochemical Workstation CHI660C. A glassy carbon working electrode, a Ag/AgNO<sub>3</sub> (0.1 M in CH<sub>3</sub>CN) reference electrode, and a Pt wire counter electrode with ferrocene (Cp<sub>2</sub>Fe) as the internal standard. The  $E_{1/2}$  values were reported with reference to Cp<sub>2</sub>Fe<sup>+0</sup>. Magnetic measurements were performed at room temperature using a Sherwood magnetic balance (Mark II). The kinetics of the reactions were studied by using an Agilent 8453 diode-array spectrophotometer. The temperature of the solutions were maintained with a PolyScience digital temperature controller connected to a circulating water bath.

### **X-ray crystallography.**

Measurements were collected on a Bruker Proteum X8 X-ray single crystal diffractometer with a multilayer mirror-monochromated Cu-K $\alpha$  radiation ( $\lambda = 1.54178 \text{ \AA}$ ). Details of the intensity data

collection and crystal data are given in Table S1. Absorption corrections were done by the multiscan method. The structures were resolved by the heavy-atom Patterson method or direct methods and refined by full-matrix least-squares using SHELX-97 and expanded using Fourier techniques.<sup>3,4</sup> All non-hydrogen atoms were refined anisotropically. H atoms were generated by the program SHELXL-97. The positions of H atoms were calculated based on riding mode with thermal parameters equal to 1.2 times or 1.5 times that of the associated C atoms and 1.2 times that of the associated N atoms, all these were participated in the calculation of final R-indices. All calculations were performed using the teXsan crystallographic software.<sup>5</sup>

**Kinetics.** The concentrations of phenol were at least in 10-fold excess to that of **1**. The reaction progress was monitored by observing absorbance changes at 616 and 665 nm for the first and second phases, respectively. Pseudo-first-order rate constants,  $k_{\text{obs}}$ , were obtained by nonlinear least-square fits of  $A_t$  vs  $t$  according to the equation  $A_t = A_{\infty} + (A_0 - A_{\infty})\exp(-k_{\text{obs}}t)$ , where  $A_0$  and  $A_{\infty}$  are the initial and final absorbance, respectively.

### Synthesis.

**[Ru<sup>II</sup>(HN-*p*-C<sub>6</sub>H<sub>4</sub>O)(L)(py)]·CH<sub>3</sub>OH (**2a**).** A solution of **1** (20 mg, 0.033 mmol) in CH<sub>3</sub>OH (20 mL) was slowly added into a solution of phenol (940 mg, 10 mmol) and py (1 mL, 12.5 mmol) in CH<sub>3</sub>OH (200 mL) with continuously stirring in 10 min. The mixture was stirred at ambient condition for 5 h. The solvent was then evaporated under vacuum and the resulting green oil was loaded onto a silica-gel column (20 × 3 cm). The column was flushed with CH<sub>2</sub>Cl<sub>2</sub> (300 mL) and followed by CH<sub>2</sub>Cl<sub>2</sub>-acetone (v/v, 5:1) to remove the first green band. Elution with CH<sub>2</sub>Cl<sub>2</sub>-CH<sub>3</sub>OH (v/v, 10:1) and recrystallization from CH<sub>2</sub>Cl<sub>2</sub> afforded **2a** as a green solid. Yield: 40 %. Single crystals suitable for X-ray analysis were obtained by slow diffusion of Et<sub>2</sub>O into a

solution of **2a** in CH<sub>3</sub>OH-py (v/v, 1:3) at 5 °C. IR (KBr, cm<sup>-1</sup>): ν(N–H) 3173; ν(C=N) 1590. Anal. calcd. (found) for C<sub>32</sub>H<sub>34</sub>N<sub>4</sub>O<sub>4</sub>Ru: C, 60.08 (60.37); H, 5.36 (5.41); N, 8.76 (9.00). <sup>1</sup>H NMR (400 MHz, *d*<sub>6</sub>-DMSO): δ13.21 (s, 1H, NH), 8.81 (d, *J* = 11.0 Hz, 1H, CH of benzoquinone imine), 8.62 (s, 1H, N=CH), 8.42 (s, 1H, N=CH), 7.78 (t, *J* = 7.6 Hz, 1H), 7.49–7.30 (m, 4H), 7.25 (d, *J* = 5.3 Hz, 2H), 7.12 (dd, *J* = 16.5, 8.4 Hz, 2H), 6.91 (d, *J* = 8.5 Hz, 2H), 6.85 (*J* = 9.4 Hz, 1H, CH of benzoquinone imine), 6.50 (d, *J* = 10.0 Hz, 1H, CH of benzoquinone imine), 6.43 (dd, *J* = 11.7, 6.7 Hz, 2H), 6.10 (d, *J* = 9.5 Hz, 1H, CH of benzoquinone imine), 4.38 (t, *J* = 9.2 Hz, 1 H, N–CH), 3.27 (t, *J* = 10.4 Hz, 1 H, N–CH), 3.14 (d, *J* = 6.0 Hz, 1H), 2.91 (d, *J* = 9.6 Hz, 1H), 1.98–1.84 (m, 3H), 1.55–1.36 (m, 3H). UV–vis (CH<sub>3</sub>OH): λ<sub>max</sub> [nm] (ε [mol<sup>-1</sup> dm<sup>3</sup> cm<sup>-1</sup>]) 201 (43000), 226 (39800), 251sh (31100), 354 (12700), 383 (19400), 428 (13000), 665 (20000).

**[Ru<sup>II</sup>(HN-*p*-Cl<sub>2</sub>C<sub>6</sub>H<sub>2</sub>O)(L)(py)]·H<sub>2</sub>O (2b)**. This green solid was prepared by a procedure similar to that for **2a** except 2,6-dichlorophenol was used and the respective green band was eluted by CH<sub>2</sub>Cl<sub>2</sub>-acetone (v/v, 5:1). Yield: 70%. IR (KBr, cm<sup>-1</sup>): ν(N–H) 3167; ν(C=N) 1590. Anal. calcd. (found) for C<sub>31</sub>H<sub>30</sub>Cl<sub>2</sub>N<sub>4</sub>O<sub>4</sub>Ru: C, 53.61 (53.54); H, 4.35 (4.28); N, 8.07 (8.09). <sup>1</sup>H NMR (400 MHz, *d*<sub>6</sub>-DMSO): δ13.35 (s, 1H, NH), 9.45 (d, *J* = 2.0 Hz, 1H, CH of benzoquinone imine), 8.72 (s, 1H, N=CH), 8.50 (s, 1H, N=CH), 7.80 (t, *J* = 7.4 Hz, 1H), 7.47 (t, *J* = 8.2 Hz, 2H), 7.35 (t, *J* = 6.8 Hz, 2H), 7.20 (dd, *J* = 16.6, 8.6 Hz, 2H), 7.13 (d, *J* = 2.2 Hz, 1H, CH of benzoquinone imine), 7.03–6.97 (m, 4H), 6.51 (dd, *J* = 15.4, 7.7 Hz, 2H), 4.48 (t, *J* = 12.0 Hz, 1 H, N–CH), 3.55 (t, *J* = 12.0 Hz, 1 H, N–CH), 3.22 (d, *J* = 11.4 Hz, 1H), 3.01 (d, *J* = 10.7 Hz, 1H), 2.06–1.90 (m, 3H), 1.67–1.43 (m, 3H). UV–vis (CH<sub>3</sub>OH): λ<sub>max</sub> [nm] (ε [mol<sup>-1</sup> dm<sup>3</sup> cm<sup>-1</sup>]) 203 (51300), 232sh (37700), 252sh (28200), 334sh (12800), 380 (17600), 444 (10900), 672 (22300).

**[Ru<sup>III</sup>(HN-*p*-C<sub>6</sub>H<sub>4</sub>O)(L)(py)](PF<sub>6</sub>) (3).** A solid [Cp<sub>2</sub>Fe](PF<sub>6</sub>) (5 mg, 0.015 mmol) was added into a green solution of **2a** (9 mg, 0.015 mmol) in CH<sub>3</sub>OH (200 mL) under argon atmosphere and the mixture was stirred for 1 min. The resulting dark purple solution was evaporated under vacuum, re-dissolved in a minimum amount of CH<sub>2</sub>Cl<sub>2</sub> and loaded onto a silica-gel column (20 × 2 cm). The column was flushed with CH<sub>2</sub>Cl<sub>2</sub> (200 mL) and then eluted with CH<sub>2</sub>Cl<sub>2</sub>-acetone (v/v, 10:1) to afford **3** as a purple solid. Single crystals suitable for X-ray analysis were obtained by slow diffusion of Et<sub>2</sub>O into a solution of **3** in CH<sub>2</sub>Cl<sub>2</sub> at 5 °C. Yield: 70%. IR (KBr, cm<sup>-1</sup>): ν(N–H) 3268; ν(C=O) 1640; ν(C=N) 1597; ν(P–F) 843. Anal. calcd. (found) for C<sub>31</sub>H<sub>30</sub>F<sub>6</sub>N<sub>4</sub>O<sub>3</sub>PRu: C, 49.47 (49.65); H, 4.02 (4.10); N, 7.44 (7.53). Magnetic moment:  $\mu_{\text{eff}} = 1.93 \mu_{\text{B}}$ . UV–vis (CH<sub>3</sub>OH):  $\lambda_{\text{max}}$  [nm] ( $\epsilon$  [mol<sup>-1</sup> dm<sup>3</sup> cm<sup>-1</sup>]) 236 (43000), 365 (16400).

## References

1. Man, W. L.; Tang, T. M.; Wong, T. W.; Lau, T. C.; Peng, S. M.; Wong, W. T. *J. Am. Chem. Soc.* **2004**, *126*, 478–479.
2. Amarego, W. L. F.; Chai, C. L. L. *Purification of Laboratory Chemicals*, 5<sup>th</sup> ed.; Butterworth Heinemann: New York, 2003.
3. Altomare, A.; Cascarano, G.; Giacovazzo, C.; Guagliardi, A.; Burla, M.; Polidori G.; Camalli, M. *J. Appl. Crystallogr.* 1994, **27**, 435.
4. DIRDIF 99, P. T. Beurskens, G. Admiraal, G. Beurskens, W. P. Bosman, R. de Gelder, R. Israel and J. M. M. Smits, The DIRDIF-99 program system, Technical Report of the Crystallography Laboratory, University of Nijmegen: The Netherlands, 1999.
5. Crystal Structure, Single Crystal Structure Analysis Software, version 3.5.1 Rigaku/MS Corporation: The Woodlands, Texas, USA, Rigaku, Akishima, Tokyo, Japan, 2003, D. J. Watkin, C. K. Prout, J. R. Carruthers and P.W. Betteridge, Crystals, Chemical Crystallography. Lab: Oxford, UK, 1996, issue 10.

**Table S1.** Crystal data and structure refinement details for **2b** and **3**.

|                                                   | <b>2b•0.75py•0.5CH<sub>3</sub>OH</b>                                                         | <b>3•2CH<sub>2</sub>Cl<sub>2</sub>•0.5CH<sub>3</sub>OH</b>                                           |
|---------------------------------------------------|----------------------------------------------------------------------------------------------|------------------------------------------------------------------------------------------------------|
| Formula                                           | C <sub>35.25</sub> H <sub>33.75</sub> Cl <sub>2</sub> N <sub>4.75</sub> O <sub>3.50</sub> Ru | C <sub>33.5</sub> H <sub>36</sub> Cl <sub>4</sub> F <sub>6</sub> N <sub>4</sub> O <sub>3.5</sub> PRu |
| <i>M<sub>r</sub></i>                              | 751.89                                                                                       | 938.50                                                                                               |
| Crystal system                                    | Orthorhombic                                                                                 | Triclinic                                                                                            |
| Space group                                       | <i>Pbca</i>                                                                                  | <i>P-1</i>                                                                                           |
| <i>a</i> /Å                                       | 24.8814(6)                                                                                   | 12.1017(5)                                                                                           |
| <i>b</i> /Å                                       | 20.0338(5)                                                                                   | 12.7507(4)                                                                                           |
| <i>c</i> /Å                                       | 29.5126(7)                                                                                   | 14.0794(5)                                                                                           |
| $\alpha$ (°)                                      | 90                                                                                           | 71.154(1)                                                                                            |
| $\beta$ (°)                                       | 90                                                                                           | 82.268(1)                                                                                            |
| $\gamma$ (°)                                      | 90                                                                                           | 71.918(1)                                                                                            |
| <i>V</i> / Å <sup>3</sup>                         | 14711.1(6)                                                                                   | 1953.10(11)                                                                                          |
| <i>Z</i>                                          | 16                                                                                           | 2                                                                                                    |
| $\rho$ /Mg m <sup>-3</sup>                        | 1.358                                                                                        | 1.596                                                                                                |
| <i>F</i> (000)                                    | 6152                                                                                         | 948                                                                                                  |
| Collected refl.                                   | 114477                                                                                       | 31915                                                                                                |
| Unique refl.                                      | 13237                                                                                        | 6908                                                                                                 |
| Final <i>R</i> indices, <i>I</i> > 2σ( <i>I</i> ) | <i>R</i> <sub>1</sub> (obs) = 0.0477,<br>w <i>R</i> (all) = 0.1361                           | <i>R</i> <sub>1</sub> (obs) = 0.0740,<br>w <i>R</i> (all) = 0.2063                                   |
| GOF                                               | 1.093                                                                                        | 1.085                                                                                                |
| No. of parameters                                 | 838                                                                                          | 481                                                                                                  |

**Table S2.** *E*<sub>1/2</sub> values of **2a**, **2b** and [Ru<sup>III</sup>(L)(py)<sub>2</sub>]<sup>+</sup> in CH<sub>3</sub>CN.

| Complex                                                | <i>E</i> <sub>1/2</sub> (Volts vs Cp <sub>2</sub> Fe <sup>+0</sup> ) |                      |                                      |
|--------------------------------------------------------|----------------------------------------------------------------------|----------------------|--------------------------------------|
|                                                        | Ru <sup>IV/III</sup>                                                 | Ru <sup>III/II</sup> | Benzoquinone<br>imine <sup>0/-</sup> |
| <b>2a</b>                                              | +0.72                                                                | −0.25                | −1.38                                |
| <b>2b</b>                                              | +0.76                                                                | −0.06                | −1.18                                |
| [Ru <sup>III</sup> (L)(py) <sub>2</sub> ] <sup>+</sup> | +0.69                                                                | −0.58                | ---                                  |

**Table S3.** Second-order rate constants and KIEs of the reaction of **1** and phenol in the presence of py in methanol at 25 °C.

|                                                           | 1st phase                        | 2nd phase                        | KIE             | KIE             |
|-----------------------------------------------------------|----------------------------------|----------------------------------|-----------------|-----------------|
|                                                           | in 0.1 M py /                    | in 0.06 M PhOH /                 | (1st phase)     | (2nd phase)     |
|                                                           | $\text{M}^{-1} \text{s}^{-1}$    | $\text{M}^{-1} \text{s}^{-1}$    |                 |                 |
| $\text{C}_6\text{H}_5\text{OH}$ in $\text{CH}_3\text{OH}$ | $(1.84 \pm 0.07) \times 10^{-1}$ | $(9.32 \pm 0.41) \times 10^{-3}$ |                 |                 |
| $\text{C}_6\text{D}_5\text{OH}$ in $\text{CH}_3\text{OH}$ | $(1.78 \pm 0.02) \times 10^{-1}$ | $(7.08 \pm 0.17) \times 10^{-3}$ | $1.03 \pm 0.05$ | $1.32 \pm 0.07$ |
| $\text{C}_6\text{H}_5\text{OD}$ in $\text{CD}_3\text{OD}$ | $(2.00 \pm 0.05) \times 10^{-1}$ | $(9.65 \pm 0.35) \times 10^{-3}$ | $0.92 \pm 0.06$ | $0.97 \pm 0.08$ |

**Table S4.** Second-order rate constants for the first phase of the reaction of **1** with 2,6-disubstituted phenols (2,6- $\text{X}_2\text{C}_6\text{H}_3\text{OH}$ ) in the presence of 0.1 M py in  $\text{CH}_3\text{OH}$  at 25.0 °C.

| <b>X</b>        | $k_2 / \text{M}^{-1} \text{s}^{-1}$ |
|-----------------|-------------------------------------|
| MeO             | $8.08 \pm 0.81$                     |
| <sup>t</sup> Bu | $2.38 \pm 0.31$                     |
| Me              | $1.06 \pm 0.08$                     |
| H               | $(1.84 \pm 0.07) \times 10^{-1}$    |
| Cl              | $(3.89 \pm 0.27) \times 10^{-2}$    |
| Br              | $(9.34 \pm 0.70) \times 10^{-2}$    |



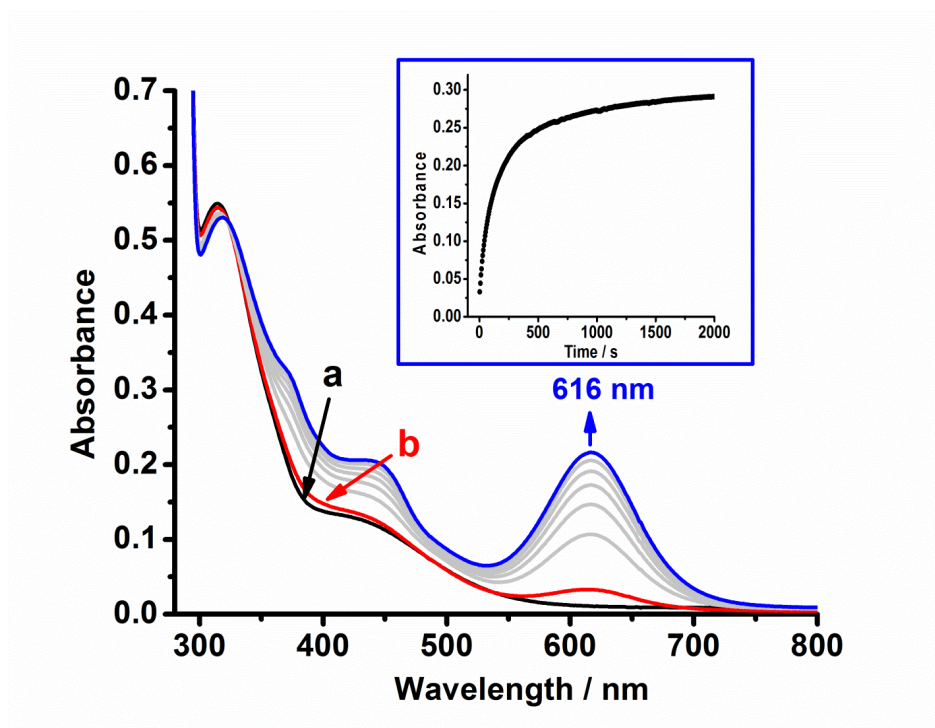

**Figure S1.** UV-vis spectral changes at 45 s intervals for the reaction of **1** ( $5.00 \times 10^{-5}$  M) with  $\text{C}_6\text{H}_5\text{OH}$  (0.11 M) in  $\text{CH}_3\text{OH}$  at  $25.0^\circ\text{C}$ . a) before mixing; b) *ca.* 3 s after mixing. Inset shows the time trace at 616 nm.

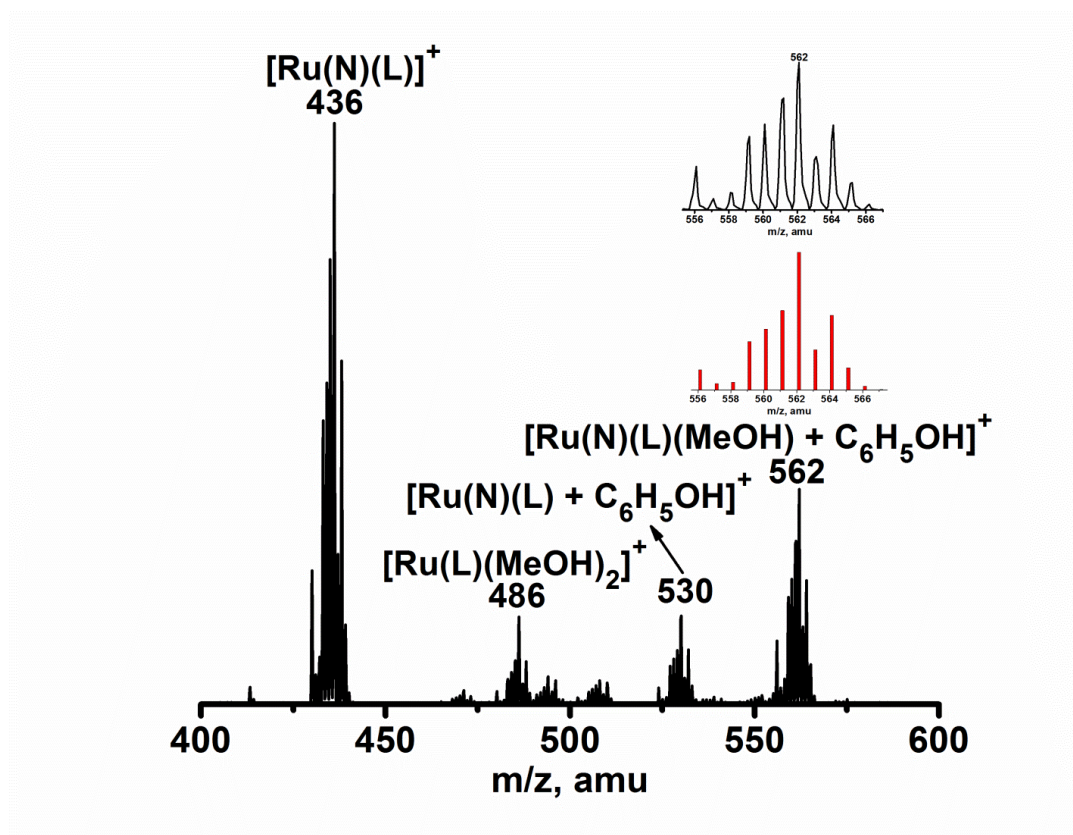

**Figure S2.** ESI mass spectrum of the green solution for the reaction of **1** with excess phenol in  $CH_3OH$ . Insets show the expanded (top) and simulated (bottom) patterns of the peak at  $m/z$  562.

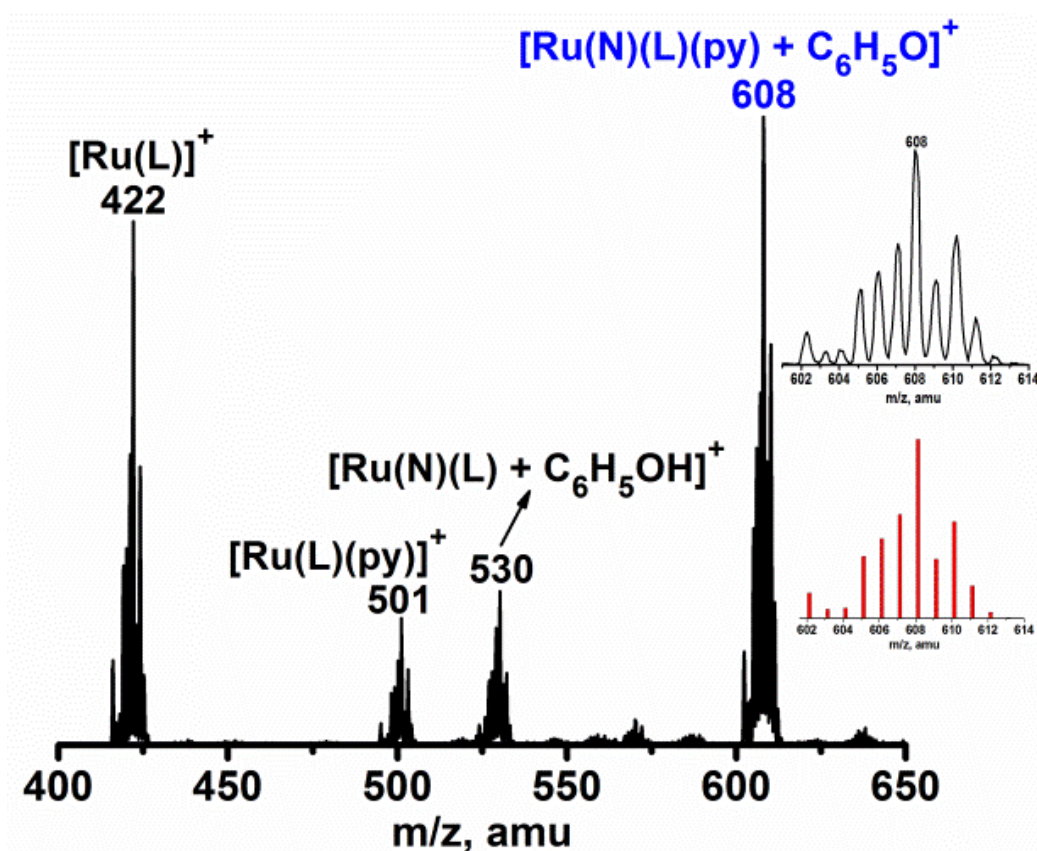

**Figure S3.** ESI mass spectrum for the reaction of **1** with  $\text{C}_6\text{H}_5\text{OH}$  in 0.1 M py in  $\text{CH}_3\text{OH}$ . Insets show the expanded (top) and simulated (bottom) isotopic patterns.

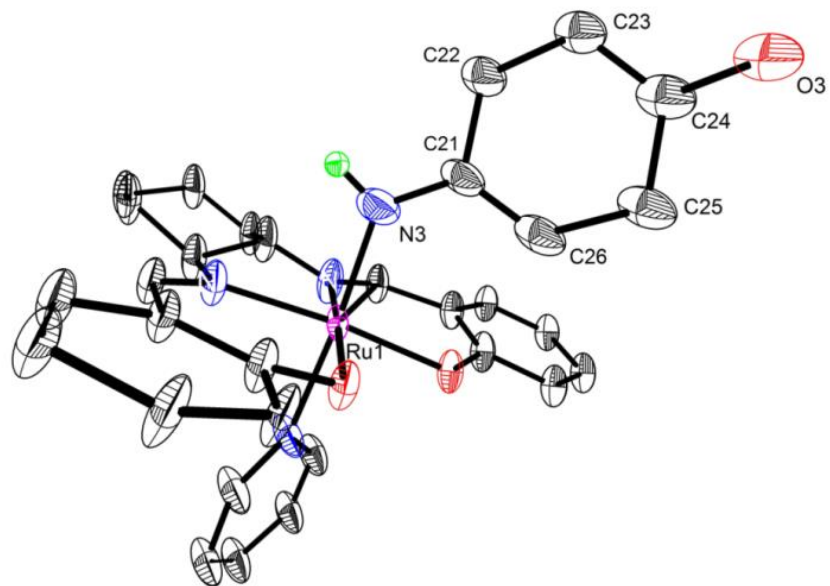

**Figure S4.** Molecular structure of **2a**.

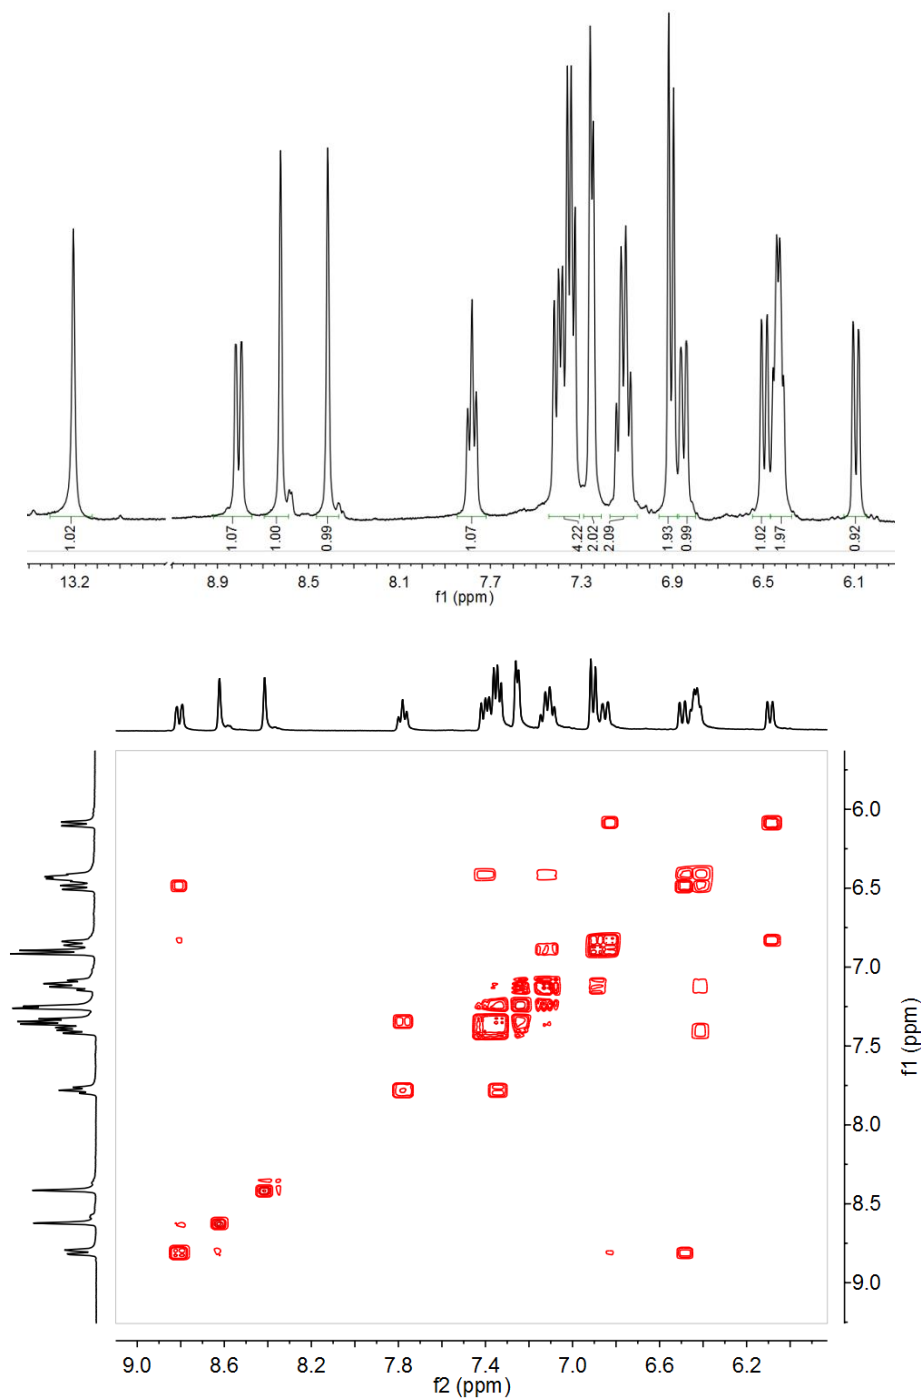

**Figure S5.** 400 MHz <sup>1</sup>H NMR (top) and (H,H) COSY (bottom) spectra of **2a** in DMSO-*d*<sub>6</sub>.

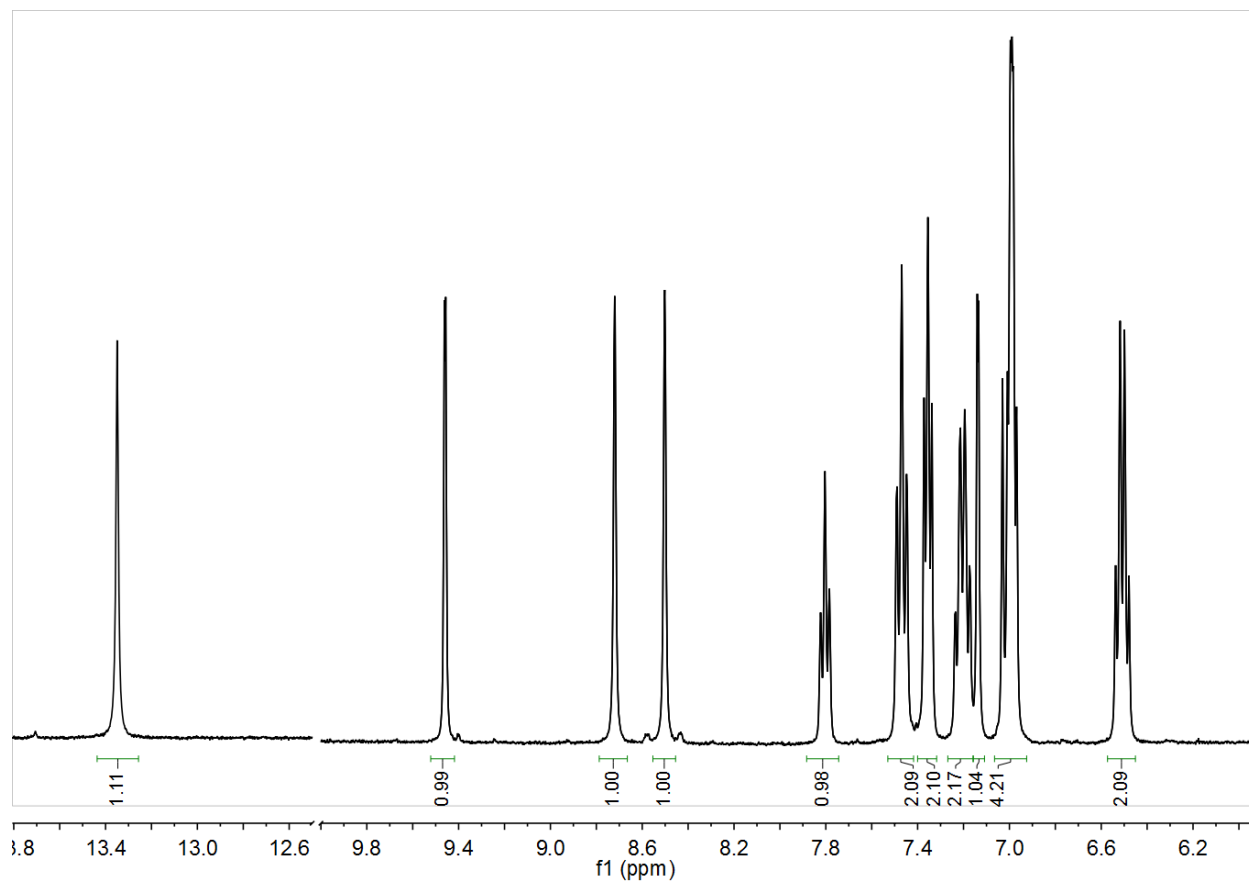

**Figure S6.** 400 MHz  $^1\text{H}$  NMR spectrum of **2b** in  $\text{DMSO}-d_6$ .

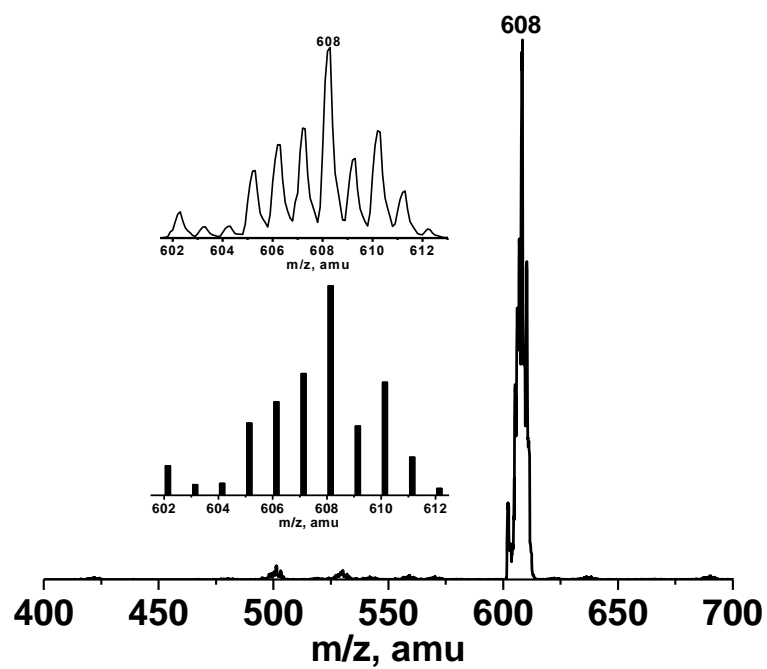

**Figure S7.** ESI mass spectrum of **2a** in  $\text{CH}_3\text{OH}$ . Insets show the expanded (top) and simulated (bottom) patterns of the peak at  $m/z$  608.

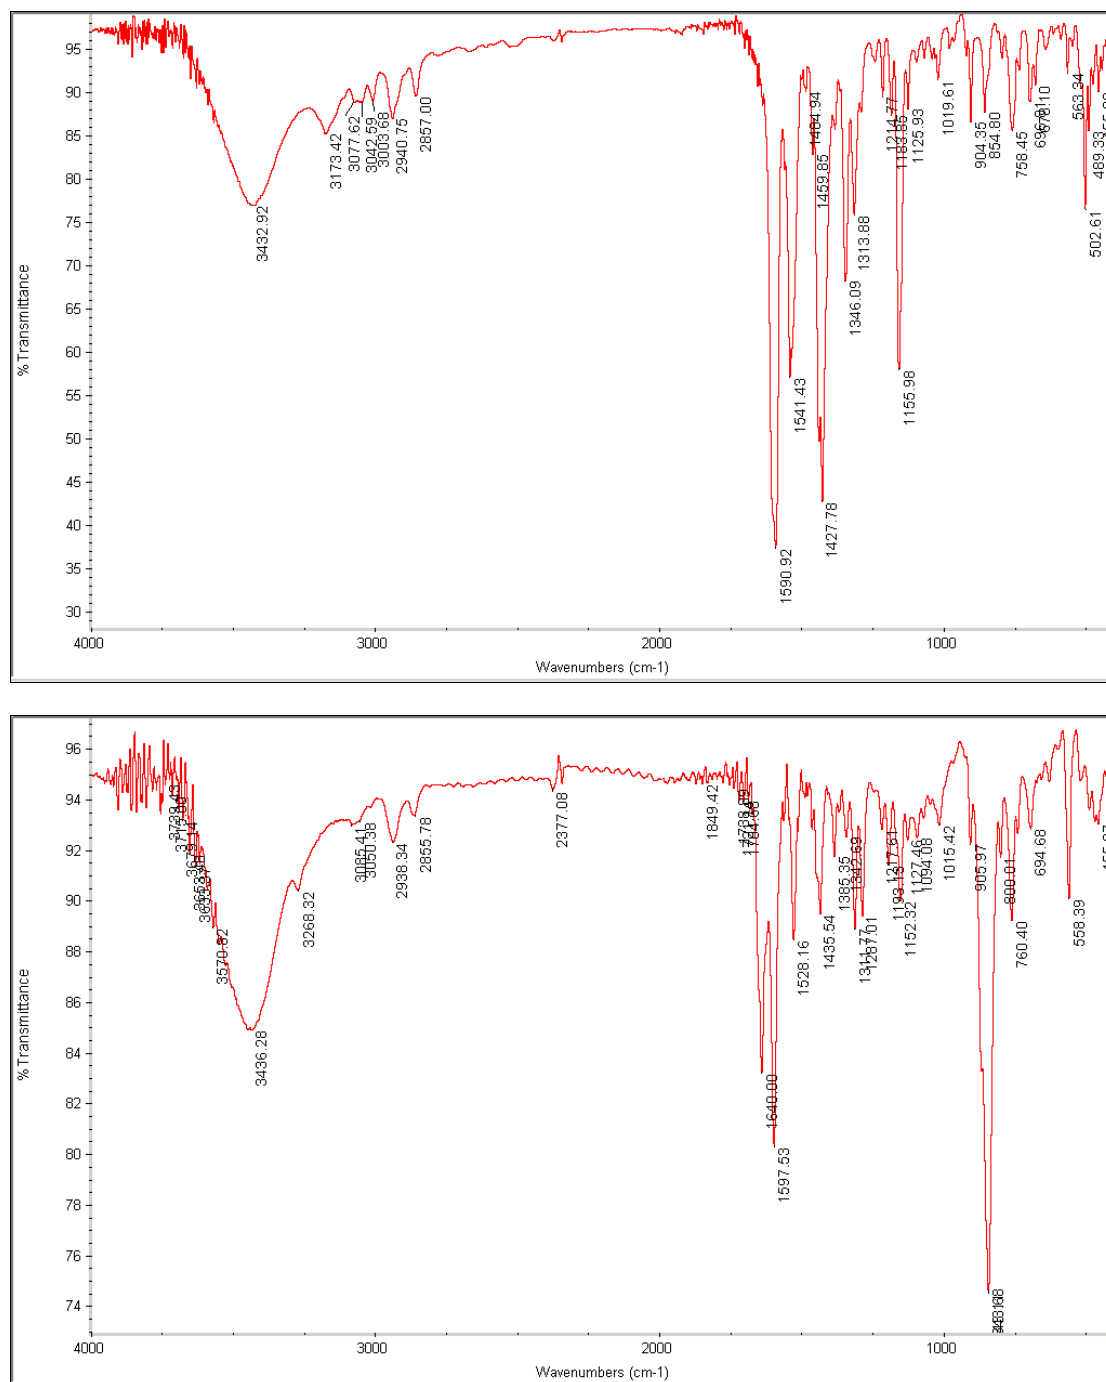

**Figure S8.** IR spectra (KBr) of **2a** (top) and **3** (bottom).



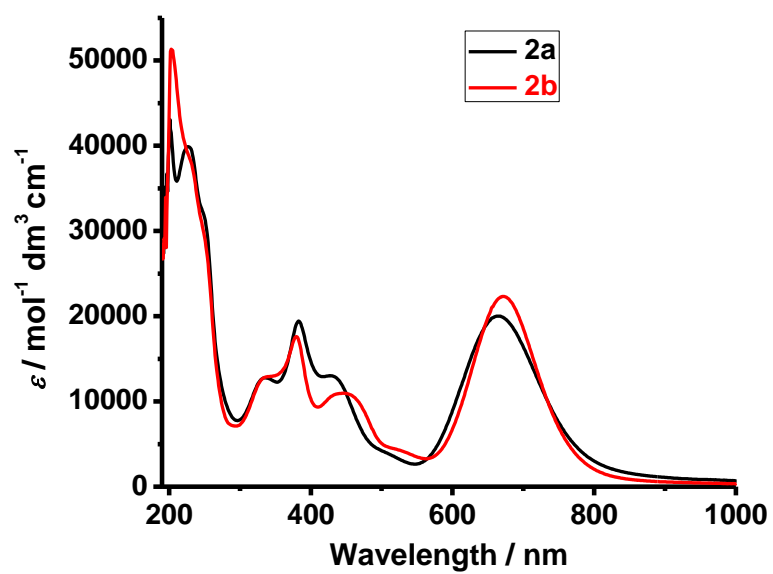

**Figure S9.** UV-vis spectra of **2a** (black line) and **2b** (red line) in CH<sub>3</sub>OH.

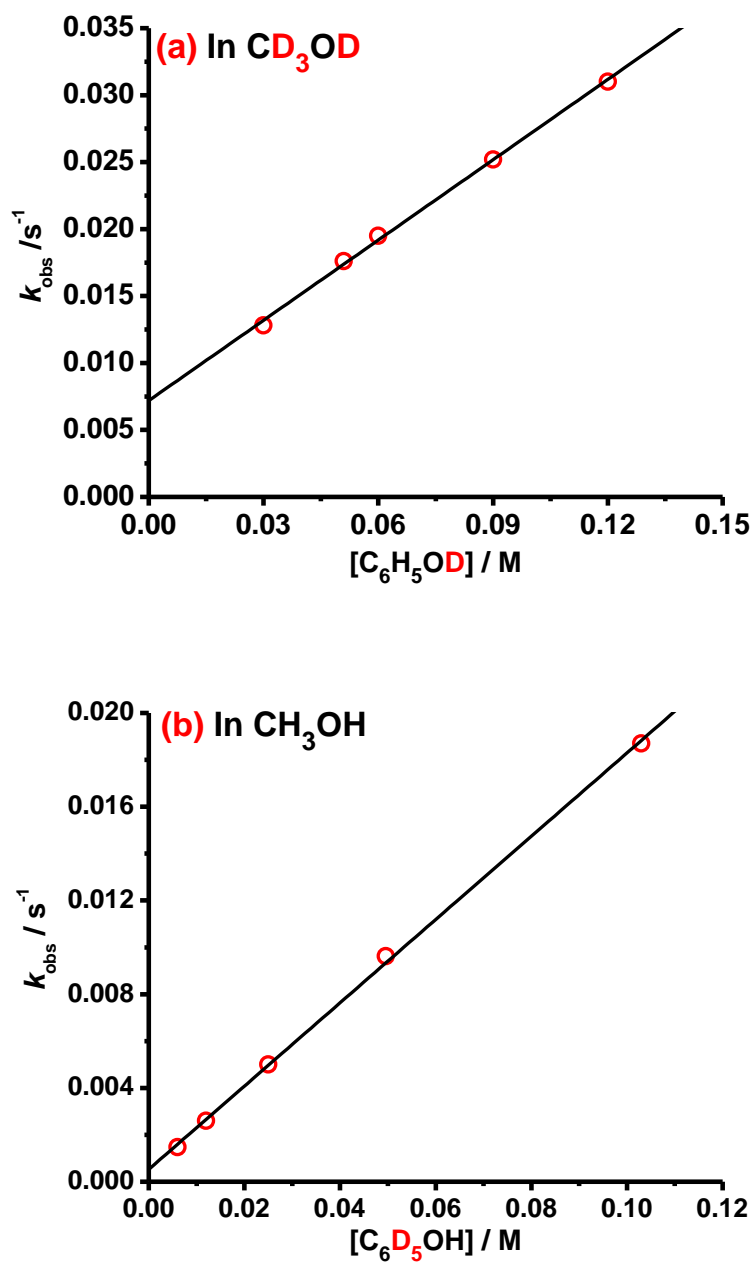

**Figure S10.** Plot of  $k_{\text{obs}}$  vs [phenol] for the first phase of the reaction of **1** with phenol in the presence of 0.1 M py in methanol at 25.0  $^{\circ}\text{C}$ . (a) For  $\text{C}_6\text{H}_5\text{OD}$  in  $\text{CD}_3\text{OD}$ : [Slope =  $(2.00 \pm 0.05) \times 10^{-1}$ ; y-intercept =  $(7.19 \pm 0.36) \times 10^{-3}$ ;  $r^2 = 0.998$ ]. (b) For  $\text{C}_6\text{D}_5\text{OH}$  in  $\text{CH}_3\text{OH}$ : [Slope =  $(1.78 \pm 0.02) \times 10^{-1}$ ; y-intercept =  $(5.27 \pm 1.30) \times 10^{-4}$ ;  $r^2 = 0.999$ ]

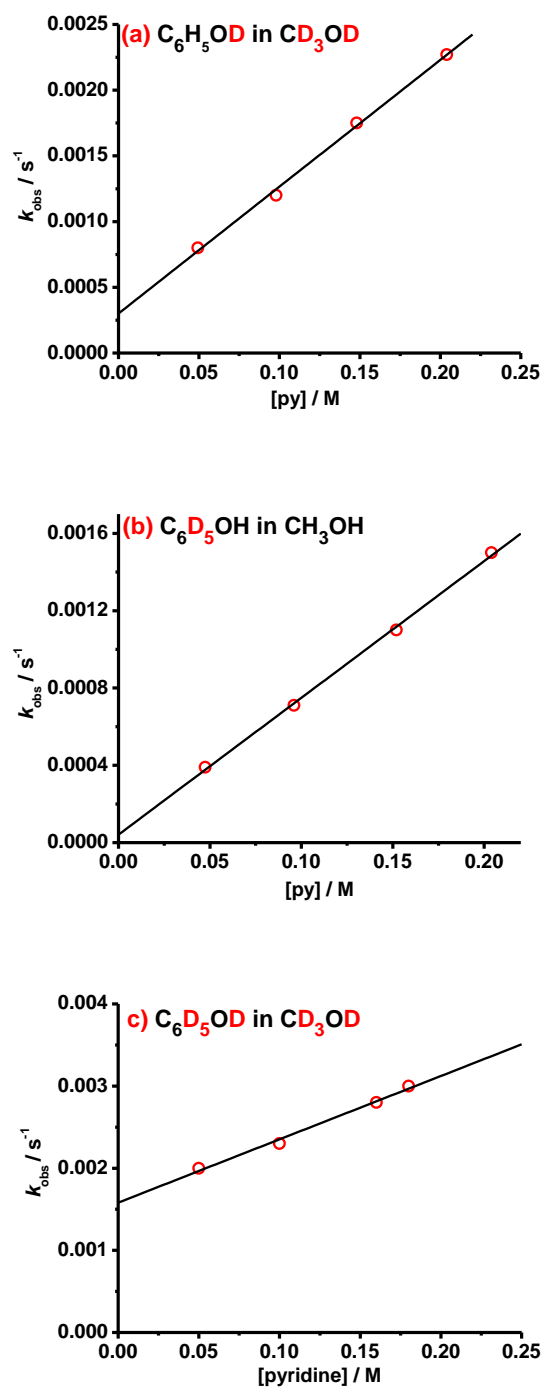

**Figure S11.** Plot of  $k_{\text{obs}}$  vs  $[\text{py}]$  for the second phase of the reaction of **1** ( $5.00 \times 10^{-5}$  M) with phenol (0.06 M) in 0.1 M py in methanol at 25.0  $^{\circ}\text{C}$ . (a) For  $\text{C}_6\text{H}_5\text{OD}$  in  $\text{CD}_3\text{OD}$ : [Slope =  $(9.65 \pm 0.35) \times 10^{-3}$ ; y-intercept =  $(3.00 \pm 0.47) \times 10^{-4}$ ;  $r^2 = 0.996$ ]. (b) For  $\text{C}_6\text{D}_5\text{OH}$  in  $\text{CH}_3\text{OH}$ : [Slope =  $(7.08 \pm 0.17) \times 10^{-3}$ ; y-intercept =  $(4.14 \pm 2.35) \times 10^{-5}$ ;  $r^2 = 0.998$ ]. (c) For  $\text{C}_6\text{D}_5\text{OD}$  in  $\text{CD}_3\text{OD}$ : [Slope =  $(7.71 \pm 0.49) \times 10^{-3}$ ; y-intercept =  $(1.58 \pm 0.06) \times 10^{-4}$ ;  $r^2 = 0.99$ ].

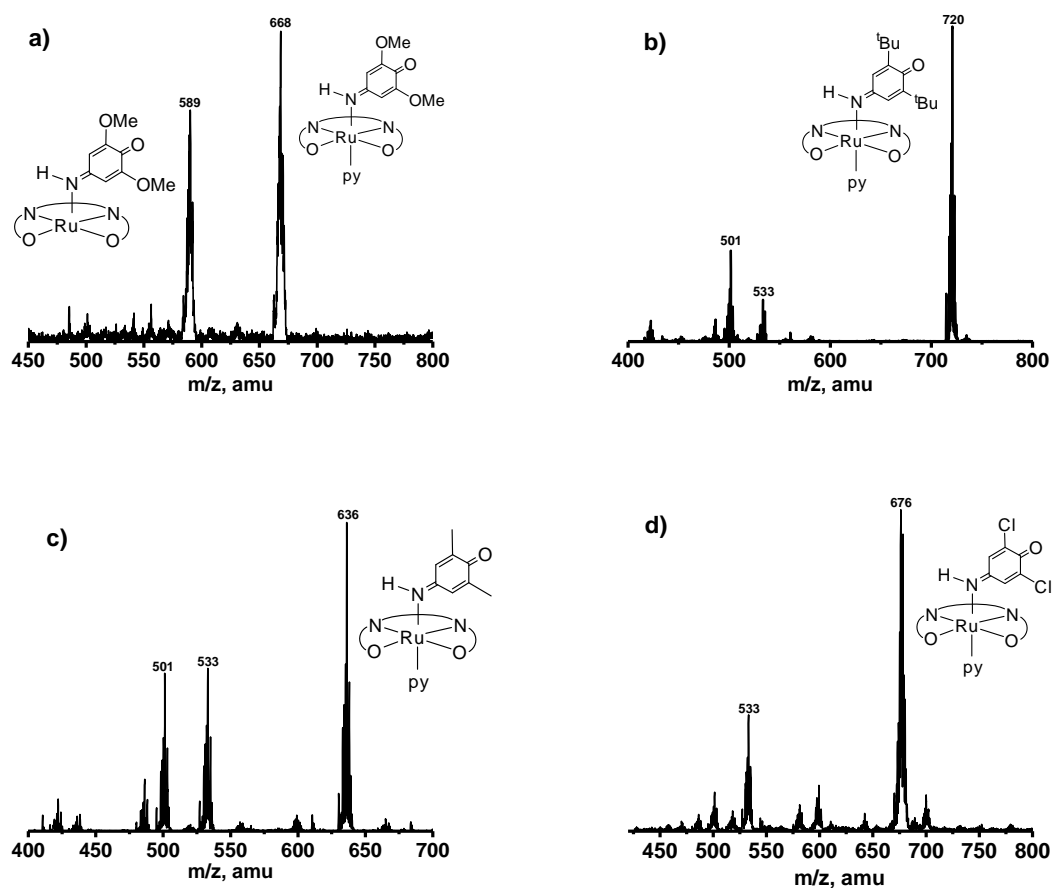

**Figure S12.** Product analysis by ESI-MS for the reaction of **1** with a) 2,6-(OMe)<sub>2</sub>-C<sub>6</sub>H<sub>3</sub>OH; b) 2,6-(<sup>t</sup>Bu)<sub>2</sub>-C<sub>6</sub>H<sub>3</sub>OH; c) 2,6-Me<sub>2</sub>-C<sub>6</sub>H<sub>3</sub>OH and d) 2,6-Cl<sub>2</sub>-C<sub>6</sub>H<sub>3</sub>OH in the presence of 0.1 M py in CH<sub>3</sub>OH.

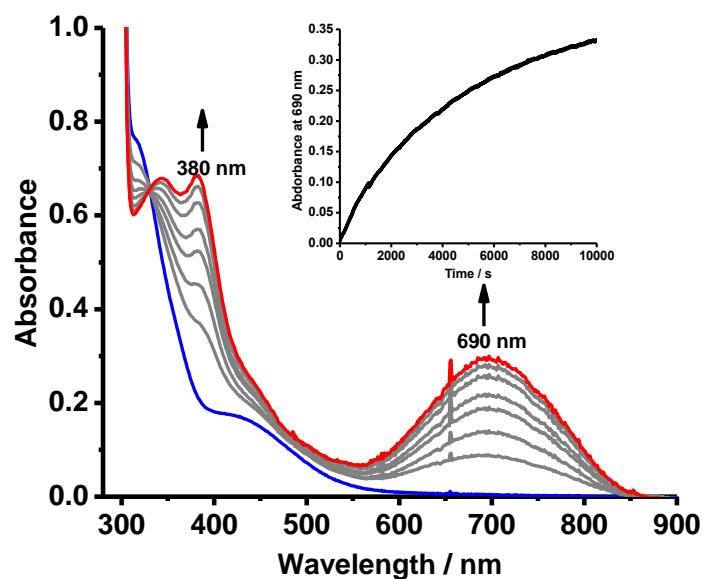

**Figure S13.** Spectrophotometric changes at 1000 s intervals for the reaction between **1** ( $5.00 \times 10^{-5}$  M) and *p*-MeO-C<sub>6</sub>H<sub>4</sub>OH (0.30 M) in the presence of 0.1 M py in CH<sub>3</sub>OH at 25.0 °C. Inset shows the absorbance-time trace at 690 nm.

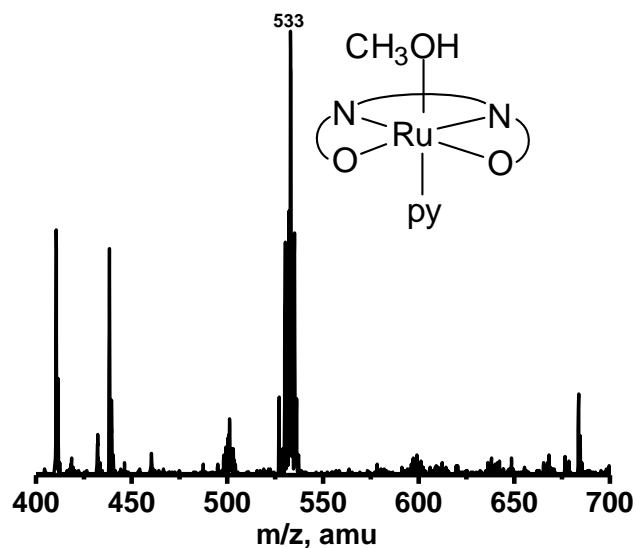

**Figure S14.** Product analysis for the reaction of **1** with *p*-MeO-C<sub>6</sub>H<sub>4</sub>OH in the presence of py in CH<sub>3</sub>OH.

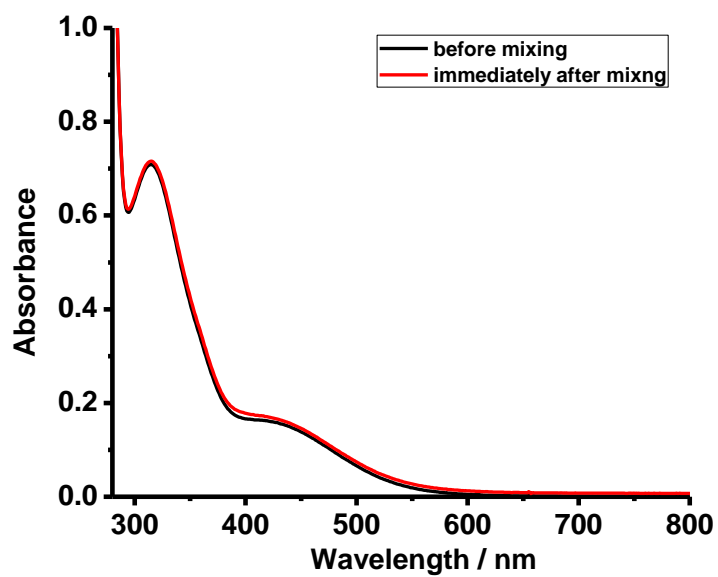

**Figure S15.** Spectral changes of the reaction of **1** ( $5 \times 10^{-5}$  M) with py (0.1 M) in  $\text{CH}_3\text{OH}$  at  $25.0^\circ\text{C}$ .
